# Supplementary material
Source: PubMed Central journal article supplement (PMC2527903)
Supplement: 0804039105_0804039105SI.pdf [file 0804039105_0804039105SI.pdf]

# Supporting Information

Andrews *et al.* 10.1073/pnas.0804039105

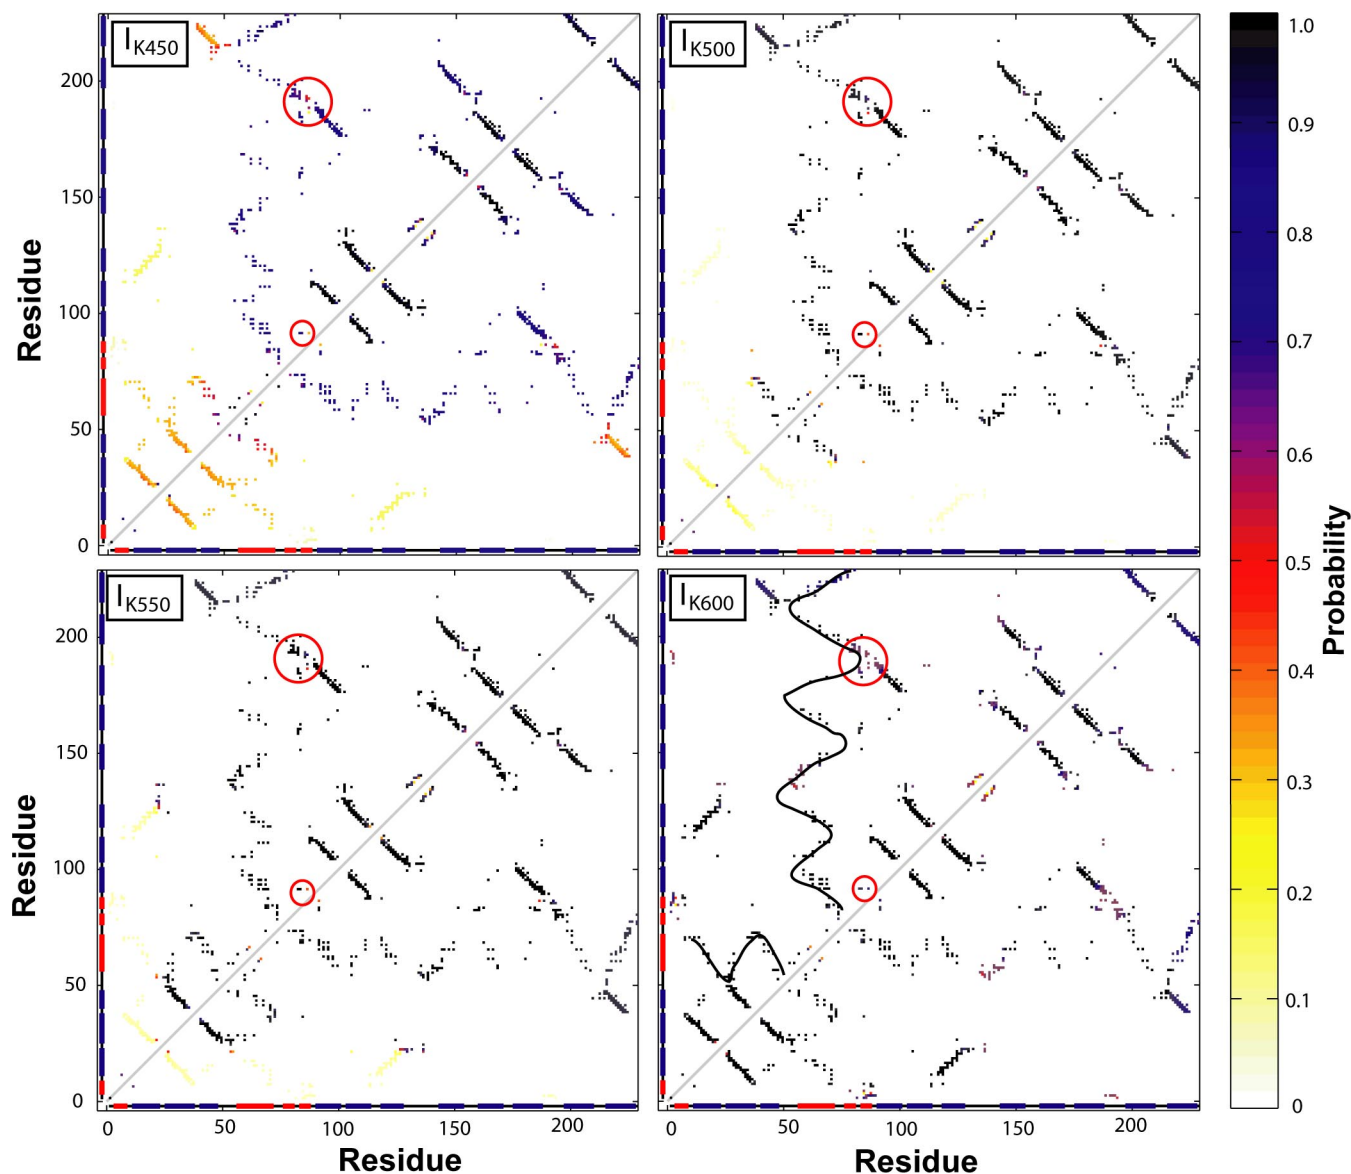

**Fig. S1.** Contact maps of kinetic intermediates. Red and blue bars along the axis show  $\alpha$ -helices and  $\beta$ -strands, respectively. The probability of a given contact being made is shown as a color on the color map on the right. Kinetics intermediates  $I_{K450}$ ,  $I_{K500}$ , and  $I_{K550}$  all are missing N-terminal  $\beta$ -strands. Kinetic intermediate  $I_{K600}$  is destabilized in the central  $\alpha$ -helix and C-terminal  $\beta$ -strand. Lines to guide the eye are drawn in  $I_{K600}$  to show contacts the  $\alpha$ -helix makes across the barrel strands. Contacts related to prolines discussed are marked with red circles. Kinetic intermediate labels do not obscure any contacts.

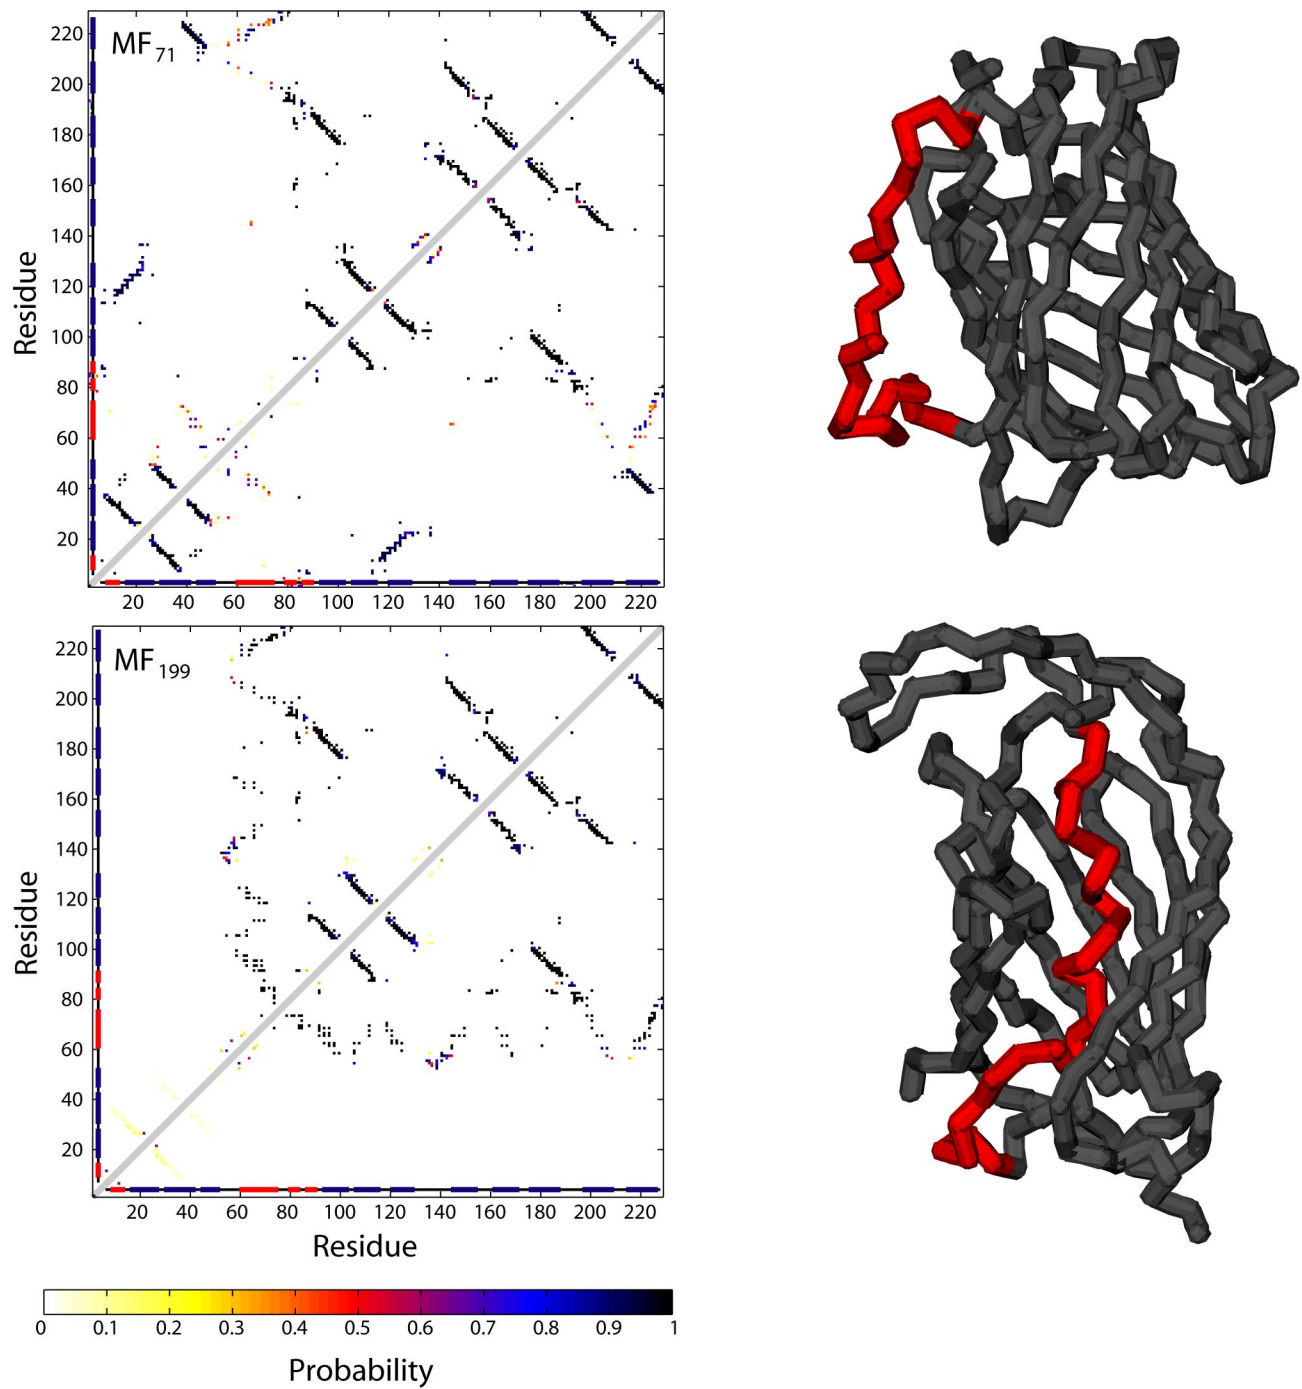

**Fig. S2.** Structure of major misfolded structures observed in kinetic trajectories. The left side of the image shows contact maps of misfolded structures, and the right half shows a representative structure. The  $\alpha$ -helix has been colored red to aid the eye. Misfolded structure MF<sub>71</sub> shows the  $\beta$ -barrel has formed, leaving the  $\alpha$ -helix outside. Misfolded structure MF<sub>199</sub> shows the N terminus "knotted" behind a loop on the lid of the barrel.



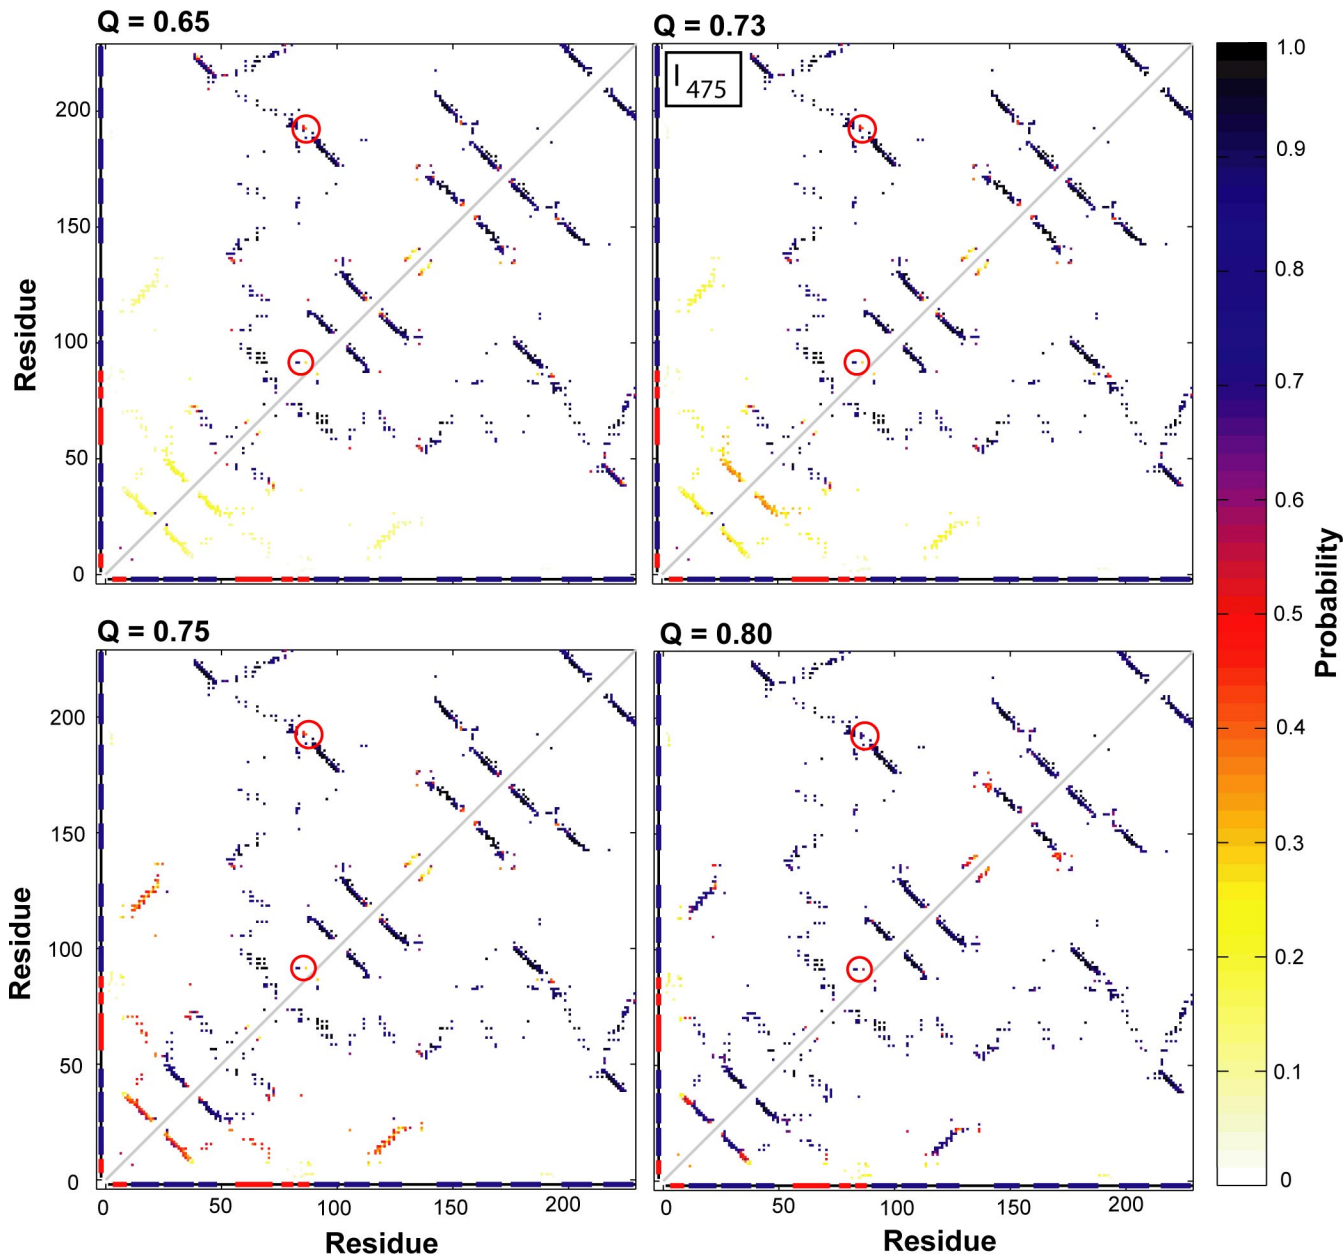

**Fig. S4.** Contact maps of thermodynamic intermediate  $I_{475}$  and  $Q$  values discussed. Red and blue bars along the axis show  $\alpha$ -helices and  $\beta$ -strands, respectively. The probability of a given contact being made is shown as a color on the color map on the right. Thermodynamic intermediate  $I_{475}$  is missing two N-terminal  $\beta$ -strands and is similar to  $I_{K500}$ . Progression through the preintermediate ( $Q = 0.65$ ), intermediate ( $Q = 0.73$ ), transition ( $Q = 0.75$ ), and posttransition ( $Q = 0.80$ ) show that the proline contacts discussed (red circles) do not form until after the transition state. Intermediate label does not obscure any contacts.

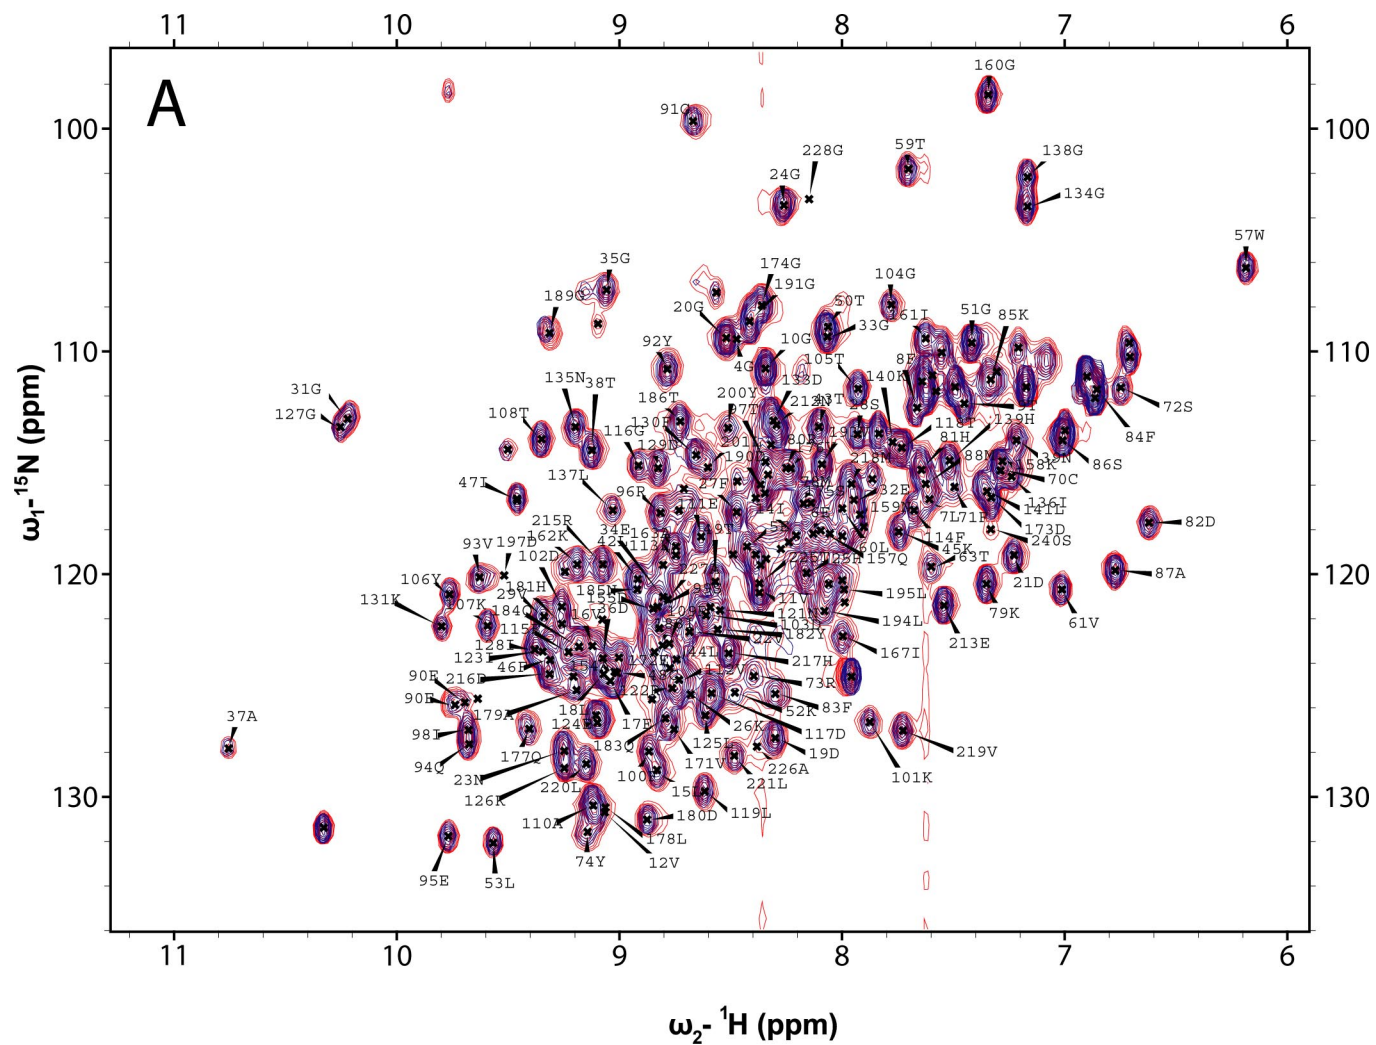

**Fig. S5.**  $^1\text{H}$ - $^{15}\text{N}$  HSQC spectra of native sfGFP (red) overlaid with trapped sfGFP (blue). The overall dispersion is nearly identical, except for three peaks: 90E, 189G, and an unassigned one at 7.99, 124.5.
